# Supplementary material for: Molecular Dissection of Phagocytosis by Proteomic Analysis in Entamoeba histolytica
Source: MDPI journal article supplement (doi:10.3390/genes14020379), 2023-01-31
Supplement: s1 [file s1]

This figure displays a complex network graph visualization. The nodes, representing entities, are labeled with EHI IDs (e.g., EHI\_026470, EHI\_198330, EHI\_053420, EHI\_031240, EHI\_069480, EHI\_154290, EHI\_062490, EHI\_118750, EHI\_002990, EHI\_009800, EHI\_017630, EHI\_176980, EHI\_134680, EHI\_164460, EHI\_138750, EHI\_031250, EHI\_161940, EHI\_039480, EHI\_026440, EHI\_138990, EHI\_140720, EHI\_035730, EHI\_096710, EHI\_113590, EHI\_006070, EHI\_010850, EHI\_004600, EHI\_151640, EHI\_118780, EHI\_198750, EHI\_197030, EHI\_04940, EHI\_103270, EHI\_081410, EHI\_000690, EHI\_094100, EHI\_146340, EHI\_035460, EHI\_012480, EHI\_044810, EHI\_042720, EHI\_044740, EHI\_054260, EHI\_186480, EHI\_070720, EHI\_145840, EHI\_098290, EHI\_110520, EHI\_049910, EHI\_049620, EHI\_111610, EHI\_160940, EHI\_154450, EHI\_130960, EHI\_048740, EHI\_023470, EHI\_042170, EHI\_117920, EHI\_079890, EHI\_029540, EHI\_129330, EHI\_167060, EHI\_147570, EHI\_134960, EHI\_122730, EHI\_024680, EHI\_190440/35450, EHI\_048310, EHI\_073470, EHI\_025230, EHI\_103410, EHI\_073650, EHI\_08730, EHI\_004790, EHI\_163650, EHI\_04512, EHI\_096210, EHI\_176140, EHI\_040700, EHI\_004590, EHI\_124560, EHI\_088090, EHI\_030820, EHI\_103550, EHI\_045710, EHI\_033740, EHI\_009570, EHI\_007350, EHI\_177400, EHI\_154330, EHI\_178080, EHI\_104560, EHI\_121780, EHI\_083590, EHI\_001950, EHI\_178980, EHI\_196940, EHI\_048630, EHI\_122850, EHI\_186840, EHI\_148050, EHI\_139460, EHI\_139460, EHI\_118780, EHI\_151640, EHI\_138990, EHI\_140720, EHI\_035730, EHI\_096710, EHI\_113590, EHI\_006070, EHI\_010850, EHI\_004600, EHI\_151640, EHI\_118780, EHI\_198750, EHI\_197030, EHI\_04940, EHI\_103270, EHI\_081410, EHI\_000690, EHI\_094100, EHI\_146340, EHI\_035460, EHI\_012480, EHI\_044810, EHI\_042720, EHI\_044740, EHI\_054260, EHI\_186480, EHI\_070720, EHI\_145840, EHI\_098290, EHI\_110520, EHI\_049910, EHI\_049620, EHI\_111610, EHI\_160940, EHI\_154450, EHI\_130960, EHI\_048740, EHI\_023470, EHI\_042170, EHI\_117920, EHI\_079890, EHI\_029540, EHI\_129330, EHI\_167060, EHI\_147570, EHI\_134960, EHI\_122730, EHI\_024680, EHI\_190440/35450, EHI\_048310, EHI\_073470, EHI\_025230, EHI\_103410, EHI\_073650, EHI\_08730, EHI\_004790, EHI\_163650, EHI\_04512, EHI\_096210, EHI\_176140, EHI\_040700, EHI\_004590, EHI\_124560, EHI\_088090, EHI\_030820, EHI\_103550, EHI\_045710, EHI\_033740, EHI\_009570, EHI\_007350, EHI\_177400, EHI\_154330, EHI\_178080, EHI\_104560, EHI\_121780, EHI\_083590, EHI\_001950, EHI\_178980, EHI\_196940, EHI\_048630, EHI\_122850, EHI\_186840, EHI\_148050, EHI\_139460, EHI\_139460, EHI\_118780, EHI\_151640, EHI\_138990, EHI\_140720, EHI\_035730, EHI\_096710, EHI\_113590, EHI\_006070, EHI\_010850, EHI\_004600, EHI\_151640, EHI\_118780, EHI\_198750, EHI\_197030, EHI\_04940, EHI\_103270, EHI\_081410, EHI\_000690, EHI\_094100, EHI\_146340, EHI\_035460, EHI\_012480, EHI\_044810, EHI\_042720, EHI\_044740, EHI\_054260, EHI\_186480, EHI\_070720, EHI\_145840, EHI\_098290, EHI\_110520, EHI\_049910, EHI\_049620, EHI\_111610, EHI\_160940, EHI\_154450, EHI\_130960, EHI\_048740, EHI\_023470, EHI\_042170, EHI\_117920, EHI\_079890, EHI\_029540, EHI\_129330, EHI\_167060, EHI\_147570, EHI\_134960, EHI\_122730, EHI\_024680, EHI\_190440/35450, EHI\_048310, EHI\_073470, EHI\_025230, EHI\_103410, EHI\_073650, EHI\_08730, EHI\_004790, EHI\_163650, EHI\_04512, EHI\_096210, EHI\_176140, EHI\_040700, EHI\_004590, EHI\_124560, EHI\_088090, EHI\_030820, EHI\_103550, EHI\_045710, EHI\_033740, EHI\_009570, EHI\_007350, EHI\_177400, EHI\_154330, EHI\_178080, EHI\_104560, EHI\_121780, EHI\_083590, EHI\_001950, EHI\_178980, EHI\_196940, EHI\_048630, EHI\_122850, EHI\_186840, EHI\_148050, EHI\_139460, EHI\_139460, EHI\_118780, EHI\_151640, EHI\_138990, EHI\_140720, EHI\_035730, EHI\_096710, EHI\_113590, EHI\_006070, EHI\_010850, EHI\_004600, EHI\_151640, EHI\_118780, EHI\_198750, EHI\_197030, EHI\_04940, EHI\_103270, EHI\_081410, EHI\_000690, EHI\_094100, EHI\_146340, EHI\_035460, EHI\_012480, EHI\_044810, EHI\_042720, EHI\_044740, EHI\_054260, EHI\_186480, EHI\_070720, EHI\_145840, EHI\_098290, EHI\_110520, EHI\_049910, EHI\_049620, EHI\_111610, EHI\_160940, EHI\_154450, EHI\_130960, EHI\_048740, EHI\_023470, EHI\_042170, EHI\_117920, EHI\_079890, EHI\_029540, EHI\_129330, EHI\_167060, EHI\_147570, EHI\_134960, EHI\_122730, EHI\_024680, EHI\_190440/35450, EHI\_048310, EHI\_073470, EHI\_025230, EHI\_103410, EHI\_073650, EHI\_08730, EHI\_004790, EHI\_163650, EHI\_04512, EHI\_096210, EHI\_176140, EHI\_040700, EHI\_004590, EHI\_124560, EHI\_088090, EHI\_030820, EHI\_103550, EHI\_045710, EHI\_033740, EHI\_009570, EHI\_007350, EHI\_177400, EHI\_154330, EHI\_178080, EHI\_104560, EHI\_121780, EHI\_083590, EHI\_001950, EHI\_178980, EHI\_196940, EHI\_048630, EHI\_122850, EHI\_186840, EHI\_148050, EHI\_139460, EHI\_139460, EHI\_118780, EHI\_151640, EHI\_138990, EHI\_140720, EHI\_035730, EHI\_096710, EHI\_113590, EHI\_006070, EHI\_010850, EHI\_004600, EHI\_151640, EHI\_118780, EHI\_198750, EHI\_197030, EHI\_04940, EHI\_103270, EHI\_081410, EHI\_000690, EHI\_094100, EHI\_146340, EHI\_035460, EHI\_012480, EHI\_044810, EHI\_042720, EHI\_044740, EHI\_054260, EHI\_186480, EHI\_070720, EHI\_145840, EHI\_098290, EHI\_110520, EHI\_049910, EHI\_049620, EHI\_111610, EHI\_160940, EHI\_154450, EHI\_130960, EHI\_048740, EHI\_

## Transiently or condition-dependently associated phagosome proteins (magnetic beads)

### Stably associated phagosome proteins (density-gradient)

- Small G protein (canonical Rabs)
- Degrading enzyme (gp63, CPs, lysozyme)
- Membrane traffic protein
- Lysosomal enzyme
- Metabolic enzyme
- Actin related protein
- Surface protein
- RNA metabolism protein
- Chaperone
- Chromatin/chromatin-binding protein
- Cytoskeletal protein (actin binding proteins)
- Membrane traffic protein (retromer components)
- Metabolite interconversion enzyme
- Protein modifying enzyme (ubiquitin-proteasome)
- Protein-binding activity modular (*E. histolytica*-specific Rabs)
- Scaffold/adaptor protein
- Transfer/carrier protein
- Translational protein (ER-localized proteins)
- Transmembrane signal receptor (hemolysin)
- Transporter (sec13)
