# Supplementary material for: Molecular Dissection of Phagocytosis by Proteomic Analysis in Entamoeba histolytica
Source: Genes (Basel). 2023 Jan 31;14(2):379. doi: 10.3390/genes14020379 (PMC9957367; doi:10.3390/genes14020379)
Supplement: Supplementary file 1 [file genes-14-00379-s001.zip › genes-2148307-supplementary.xlsx]

## Sheet: Supplemental Table S1
<Phagosome proteins detected in all five proteomes>
Protein annotation	EHI_number	Common name
Small G-protein
Small GTPase Rab7A OS=Entamoeba histolytica GN=EhRab7A PE=2 SV=1	EHI_192810	Rab7A
Rab family GTPase OS=Entamoeba histolytica GN=EHI_161030 PE=3 SV=1	EHI_161030	Rab11C
Rab family GTPase OS=Entamoeba histolytica GN=EhRabC1 PE=2 SV=1	EHI_153690	RabC1
Rab family GTPase (Fragment) OS=Entamoeba histolytica GN=EhRabC3 PE=3 SV=1	EHI_143650	RabC3
EhRab7D protein OS=Entamoeba histolytica GN=EhRAB7D PE=3 SV=1	EHI_082070	Rab7D
EhRab7B protein OS=Entamoeba histolytica GN=EhRAB7B PE=3 SV=1	EHI_081330	Rab7B
Small GTPase Rab11B OS=Entamoeba histolytica GN=EhRab11B PE=2 SV=1	EHI_107250	Rab11B
Cluster of Rab family GTPase OS=Entamoeba histolytica GN=EhRab1A PE=2 SV=1 (Q9BLF3)	EHI_108610	Rab1A
Rho family GTPase OS=Entamoeba histolytica GN=EHI_070730 PE=3 SV=1	EHI_070730	Rho1
Rho family GTPase OS=Entamoeba histolytica GN=EHI_129750 PE=3 SV=1	EHI_129750	Rho7
Ras family GTPase OS=Entamoeba histolytica GN=EHI_058090 PE=2 SV=1	EHI_058090
degrading enzyme
Cell surface protease gp63, putative OS=Entamoeba histolytica GN=EHI_200230 PE=4 SV=1	EHI_200230
Lysozyme, putative OS=Entamoeba histolytica GN=EHI_199110 PE=4 SV=1	EHI_199110
Lysozyme, putative OS=Entamoeba histolytica GN=EHI_096570 PE=2 SV=1	EHI_096570
Cysteine proteinase, putative OS=Entamoeba histolytica GN=EHI_050570 PE=2 SV=1	EHI_050570	CP4
Cysteine proteinase OS=Entamoeba histolytica GN=CP5 PE=2 SV=2	EHI_168240	CP5
Cysteine proteinase 1, putative OS=Entamoeba histolytica GN=EHI_074180 PE=3 SV=1	EHI_074180	CP1
Cluster of Dipeptidyl-peptidase OS=Entamoeba histolytica GN=dpp PE=2 SV=1 (Q9U593)	EHI_136440
Alpha-amylase family protein OS=Entamoeba histolytica GN=EHI_023360 PE=4 SV=1	EHI_023360
Beta-hexosaminidase OS=Entamoeba histolytica GN=EHI_007330 PE=3 SV=1	EHI_007330
Serine carboxypeptidase (S28) family protein OS=Entamoeba histolytica GN=EHI_054530 PE=4 SV=1	EHI_054530
Histolysain OS=Entamoeba histolytica GN=CPP2 PE=1 SV=1	EHI_033710
membrane trafficking
Copine, putative OS=Entamoeba histolytica GN=EHI_163260 PE=4 SV=1	EHI_163260
Cluster of Receptor mediated endocytosis protein, putative OS=Entamoeba histolytica GN=EHI_105270 PE=4 SV=1 (C4M131)	EHI_105270
Multidrug resistance protein, putative OS=Entamoeba histolytica GN=EHI_100320 PE=3 SV=1	EHI_100320
Lysosomal enzyme
Vacuolar proton ATPase subunit, putative OS=Entamoeba histolytica GN=EHI_074020 PE=4 SV=1	EHI_074020
Cluster of Plasma membrane calcium-transporting ATPase, putative OS=Entamoeba histolytica GN=EHI_054830 PE=3 SV=1 (C4M2K1)	EHI_054830
EhSyntaxin B OS=Entamoeba histolytica GN=EHI_021410 PE=4 SV=1	EHI_021410
Metabolic enzyme
Peptidyl-prolyl cis-trans isomerase OS=Entamoeba histolytica GN=CYP1 PE=2 SV=1	EHI_125840
Acid phosphatase, putative OS=Entamoeba histolytica GN=EHI_146950 PE=4 SV=1	EHI_146950
Cluster of NAD(P) transhydrogenase subunit alpha, putative OS=Entamoeba histolytica GN=EHI_014030 PE=4 SV=2 (Q24858)	EHI_014030
Lecithin:cholesterol acyltransferase domain-containing protein OS=Entamoeba histolytica GN=EHI_136400 PE=4 SV=1	EHI_136400
Leucine-rich repeat containing protein OS=Entamoeba histolytica GN=EHI_073580 PE=4 SV=1	EHI_073580	Thiol reductase
Actin related
Filopodin, putative OS=Entamoeba histolytica GN=EHI_080740 PE=4 SV=1	EHI_080740
Surface protein
Immuno-dominant variable surface antigen OS=Entamoeba histolytica GN=EHI_015380 PE=4 SV=1	EHI_015380
Cluster of Gal/GalNAc lectin heavy subunit OS=Entamoeba histolytica GN=EHI_012270 PE=4 SV=1 (C4LTM0)	EHI_012270
Uncharacterized
Putative uncharacterized protein OS=Entamoeba histolytica GN=EHI_118820 PE=4 SV=1	EHI_118820	PhospholipaseB
Putative uncharacterized protein OS=Entamoeba histolytica GN=EHI_097630 PE=4 SV=1	EHI_097630	PhospholipaseB
Putative uncharacterized protein OS=Entamoeba histolytica GN=EHI_096790 PE=4 SV=1	EHI_096790	Copine
Putative uncharacterized protein OS=Entamoeba histolytica GN=EHI_039860 PE=4 SV=1	EHI_039860	Mutase

## Sheet: Supplemental Table S2
<Phagosomal proteins that were detected only in Proteomes 4 and 5>
Protein annotation	EHI_number
Protein SEY1 homolog 1 OS=Entamoeba histolytica GN=EHI_012280 PE=3 SV=1	EHI_012280
HEAT repeat domain containing protein OS=Entamoeba histolytica GN=EHI_069480 PE=4 SV=1	EHI_069480
2,3-bisphosphoglycerate-independent phosphoglycerate mutase, putative OS=Entamoeba histolytica GN=EHI_050940 PE=2 SV=1	EHI_050940
Aminoacyl-histidine dipeptidase, putative OS=Entamoeba histolytica GN=EHI_042170 PE=2 SV=1	EHI_042170
Cluster of Cysteine synthase A, putative OS=Entamoeba histolytica GN=EHI_024230 PE=4 SV=1 (C4M0H9)	EHI_024230
Rab GDP dissociation inhibitor alpha, putative OS=Entamoeba histolytica GN=EHI_167060 PE=2 SV=1	EHI_167060
Profilin OS=Entamoeba histolytica GN=EHI_176140 PE=3 SV=1	EHI_176140
Ubiquitin, putative OS=Entamoeba histolytica GN=EHI_166800 PE=4 SV=1	EHI_166800
Cluster of Alcohol dehydrogenase, putative OS=Entamoeba histolytica GN=EHI_160940 PE=4 SV=1 (C4M2R2)	EHI_160940
Putative uncharacterized protein OS=Entamoeba histolytica GN=EHI_189930 PE=4 SV=1	EHI_189930
Cluster of Coronin OS=Entamoeba histolytica GN=EHI_083590 PE=3 SV=1 (C4M943)	EHI_083590
60S acidic ribosomal protein P0, putative OS=Entamoeba histolytica GN=EHI_090400 PE=2 SV=1	EHI_090400
Cluster of Putative uncharacterized protein OS=Entamoeba histolytica GN=EHI_004550 PE=4 SV=1 (C4LYR5)	EHI_004550
3-ketoacyl-CoA synthase OS=Entamoeba histolytica GN=EHI_112870 PE=3 SV=1	EHI_112870
Galactokinase, putative OS=Entamoeba histolytica GN=EHI_094100 PE=2 SV=1	EHI_094100
DEAD/DEAH box helicase, putative OS=Entamoeba histolytica GN=EHI_093900 PE=3 SV=1	EHI_093900
Cluster of Peroxiredoxin OS=Entamoeba histolytica GN=EHI_145840 PE=2 SV=1 (C4M3Q0)	EHI_145840
Phosphoglycerate kinase OS=Entamoeba histolytica GN=EHI_188180 PE=2 SV=1	EHI_188180
Ribosomal protein L15 OS=Entamoeba histolytica GN=EHI_020300 PE=2 SV=1	EHI_020300
Purine nucleoside phosphorylase, putative OS=Entamoeba histolytica GN=EHI_048740 PE=2 SV=1	EHI_048740
Cell division cycle protein 48, putative OS=Entamoeba histolytica GN=EHI_045120 PE=3 SV=1	EHI_045120
Aspartyl-tRNA synthetase, putative OS=Entamoeba histolytica GN=EHI_175050 PE=1 SV=1	EHI_175050
EhSec31 OS=Entamoeba histolytica GN=EHI_103410 PE=4 SV=1	EHI_103410
Elongation factor 2 OS=Entamoeba histolytica GN=EHI_166810 PE=4 SV=1	EHI_166810
Fe-S cluster assembly protein NifU, putative OS=Entamoeba histolytica GN=EHI_049620 PE=4 SV=1	EHI_049620
Putative uncharacterized protein OS=Entamoeba histolytica GN=EHI_065490 PE=4 SV=1	EHI_065490
60S ribosomal protein L3, putative OS=Entamoeba histolytica GN=EHI_005890 PE=2 SV=1	EHI_005890
Cluster of Type A flavoprotein, putative OS=Entamoeba histolytica GN=EHI_096710 PE=2 SV=1 (B1N2F9)	EHI_096710
14-3-3 protein 2 OS=Entamoeba histolytica GN=EHI_098280 PE=2 SV=1	EHI_098280
Purine nucleoside phosphorylase, putative OS=Entamoeba histolytica GN=EHI_130960 PE=1 SV=1	EHI_130960
Rho GDP exchange inhibitor, putative OS=Entamoeba histolytica GN=EHI_147570 PE=4 SV=1	EHI_147570
Uncharacterized protein OS=Entamoeba histolytica GN=EHI_047800 PE=2 SV=1	EHI_047800
Putative uncharacterized protein OS=Entamoeba histolytica GN=EHI_083620 PE=4 SV=1	EHI_083620
Cluster of Serine palmitoyltransferase, putative OS=Entamoeba histolytica GN=EHI_152280 PE=3 SV=1 (C4LSR6)	EHI_152280
Leucine-rich repeat containing protein OS=Entamoeba histolytica GN=EHI_164460 PE=4 SV=1	EHI_164460
Aminopeptidase, putative OS=Entamoeba histolytica GN=EHI_008380 PE=4 SV=1	EHI_008380
60S ribosomal protein L10a, putative OS=Entamoeba histolytica GN=EHI_012480 PE=2 SV=1	EHI_012480
L-myo-inositol-1-phosphate synthase OS=Entamoeba histolytica GN=EHI_070720 PE=4 SV=1	EHI_070720
40S ribosomal protein S3, putative OS=Entamoeba histolytica GN=EHI_146340 PE=2 SV=1	EHI_146340
Alcohol dehydrogenase, putative OS=Entamoeba histolytica GN=EHI_166490 PE=2 SV=1	EHI_166490
AP-2 complex protein, putative OS=Entamoeba histolytica GN=EHI_045710 PE=4 SV=1	EHI_045710
40S ribosomal protein SA OS=Entamoeba histolytica GN=EHI_081410 PE=2 SV=1	EHI_081410
Cluster of 40S ribosomal protein S4, putative OS=Entamoeba histolytica GN=EHI_118170 PE=3 SV=1 (B1N336)	EHI_118170
Putative uncharacterized protein OS=Entamoeba histolytica GN=EHI_005150 PE=4 SV=1	EHI_005150
ARP2/3 complex 20 kDa subunit, putative OS=Entamoeba histolytica GN=EHI_030820 PE=4 SV=1	EHI_030820
Enhancer binding protein-1 OS=Entamoeba histolytica GN=EHI_121780 PE=4 SV=1	EHI_121780
Putative uncharacterized protein OS=Entamoeba histolytica GN=EHI_148050 PE=4 SV=1	EHI_148050
NADP-dependent alcohol dehydrogenase OS=Entamoeba histolytica GN=EHI_023110 PE=2 SV=1	EHI_023110
Polyadenylate-binding protein, putative OS=Entamoeba histolytica GN=EHI_033250 PE=4 SV=1	EHI_033250
Cluster of Glutamate synthase beta subunit, putative OS=Entamoeba histolytica GN=EhNO1 PE=4 SV=1 (C4LUA1)	EHI_110520
Translation initiation factor eIF-5A, putative OS=Entamoeba histolytica GN=EHI_186480 PE=4 SV=1	EHI_186480
Putative uncharacterized protein OS=Entamoeba histolytica GN=EHI_010570 PE=4 SV=1	EHI_010570
Adaptor protein (AP) family protein OS=Entamoeba histolytica GN=EHI_013040 PE=4 SV=1	EHI_013040
Putative uncharacterized protein OS=Entamoeba histolytica GN=EHI_024350 PE=4 SV=1	EHI_024350
14-3-3 protein 1 OS=Entamoeba histolytica GN=EHI_025360 PE=2 SV=1	EHI_025360
GTP-binding protein OS=Entamoeba histolytica GN=EHI_031410 PE=3 SV=1	EHI_031410
Putative uncharacterized protein OS=Entamoeba histolytica GN=EHI_035730 PE=4 SV=1	EHI_035730
Cluster of Actin, putative OS=Entamoeba histolytica GN=EHI_048630 PE=3 SV=1 (C4M2X6)	EHI_048630
ADP-ribosylation factor 1, putative OS=Entamoeba histolytica GN=EHI_073470 PE=1 SV=1	EHI_073470
Putative uncharacterized protein OS=Entamoeba histolytica GN=EHI_080260 PE=4 SV=1	EHI_080260
Seryl-tRNA synthetase, putative OS=Entamoeba histolytica GN=EHI_092640 PE=3 SV=1	EHI_092640
Cluster of Hexokinase OS=Entamoeba histolytica GN=HXK1 PE=2 SV=1 (Q27647)	EHI_098290
Putative uncharacterized protein OS=Entamoeba histolytica GN=EHI_118750 PE=4 SV=1	EHI_118750
PIWI, putative OS=Entamoeba histolytica GN=EHI_125650 PE=4 SV=1	EHI_125650
Thioredoxin reductase OS=Entamoeba histolytica GN=EHI_155440 PE=1 SV=1	EHI_155440
Actin-binding protein, cofilin/tropomyosin family OS=Entamoeba histolytica GN=EHI_186840 PE=4 SV=1	EHI_186840
Ras family GTPase OS=Entamoeba histolytica GN=EHI_198330 PE=2 SV=1	EHI_198330
Heat shock protein 70 family OS=Entamoeba histolytica GN=EHI_001950 PE=3 SV=1	EHI_001950
Vacuolar protein sorting 35 OS=Entamoeba histolytica GN=Vps35-1 PE=4 SV=2	EHI_002990
40S ribosomal protein S13, putative OS=Entamoeba histolytica GN=EHI_035460 PE=3 SV=1	EHI_035460
Adenosylhomocysteinase OS=Entamoeba histolytica GN=EHI_068250 PE=2 SV=1	EHI_068250
Pleckstrin homology (PH) domain containing protein OS=Entamoeba histolytica GN=EHI_117920 PE=4 SV=1	EHI_117920
Polyadenylate-binding protein, putative OS=Entamoeba histolytica GN=EHI_198750 PE=4 SV=1	EHI_198750
EhSec13 (Fragment) OS=Entamoeba histolytica GN=EHI_001050 PE=4 SV=1	EHI_001050
Beta prime-COP OS=Entamoeba histolytica GN=EHI_004590 PE=4 SV=1	EHI_004590
Cluster of Putative uncharacterized protein OS=Entamoeba histolytica GN=EHI_030750 PE=4 SV=1 (C4M1E4)	EHI_030750
60S acidic riboomal protein P1, putative OS=Entamoeba histolytica GN=EHI_042920 PE=4 SV=1	EHI_042920
EhSec24C OS=Entamoeba histolytica GN=EHI_048310 PE=4 SV=1	EHI_048310
Long-chain-fatty-acid--CoA ligase, putative OS=Entamoeba histolytica GN=EHI_079300 PE=4 SV=1	EHI_079300
PCTP-like protein, putative OS=Entamoeba histolytica GN=EHI_110720 PE=2 SV=1	EHI_110720
Long-chain-fatty-acid--CoA ligase, putative OS=Entamoeba histolytica GN=EHI_127830 PE=4 SV=1	EHI_127830
Putative uncharacterized protein OS=Entamoeba histolytica GN=EHI_156420 PE=4 SV=1	EHI_156420
Dolichyl-diphosphooligosaccharide-protein glycotransferase, putative OS=Entamoeba histolytica GN=EHI_183010 PE=4 SV=1	EHI_183010
Putative uncharacterized protein OS=Entamoeba histolytica GN=EHI_198580 PE=4 SV=1	EHI_198580
Nucleotide binding protein 2, putative OS=Entamoeba histolytica GN=EHI_000610 PE=4 SV=1	EHI_000610
Hybrid-cluster protein OS=Entamoeba histolytica GN=HCP PE=2 SV=1	EHI_004600
UDP-glucose:glycoprotein glucosyltransferase, putative OS=Entamoeba histolytica GN=EHI_015280 PE=4 SV=1	EHI_015280
Cluster of Protein SEY1 homolog 2 OS=Entamoeba histolytica GN=EHI_054180 PE=3 SV=1 (C4M6U3)	EHI_054180
Cluster of P-glycoprotein 6, putative OS=Entamoeba histolytica GN=EHI_081130 PE=3 SV=1 (B1N3U1)	EHI_081130
Cortexillin, putative OS=Entamoeba histolytica GN=EHI_104560 PE=4 SV=1	EHI_104560
T-complex protein 1 subunit delta OS=Entamoeba histolytica GN=EHI_114120 PE=3 SV=1	EHI_114120
Tyrosine kinase, putative OS=Entamoeba histolytica GN=EHI_138750 PE=4 SV=1	EHI_138750
Myosin heavy chain OS=Entamoeba histolytica GN=EHI_140720 PE=4 SV=1	EHI_140720
Putative uncharacterized protein OS=Entamoeba histolytica GN=EHI_141330 PE=4 SV=1	EHI_141330
Calmodulin, putative OS=Entamoeba histolytica GN=EHI_148890 PE=4 SV=1	EHI_148890
Vacuolar protein sorting-associated protein 45, putative OS=Entamoeba histolytica GN=EHI_154290 PE=4 SV=1	EHI_154290
Putative uncharacterized protein OS=Entamoeba histolytica GN=EHI_161640 PE=4 SV=1	EHI_161640
Putative uncharacterized protein OS=Entamoeba histolytica GN=EHI_176980 PE=4 SV=1	EHI_176980
Sulfate adenylyltransferase, putative OS=Entamoeba histolytica GN=EHI_197160 PE=2 SV=1	EHI_197160
Putative uncharacterized protein OS=Entamoeba histolytica GN=EHI_001100 PE=4 SV=1	EHI_001100
EhSec23A OS=Entamoeba histolytica GN=EHI_008730 PE=4 SV=1	EHI_008730
Cysteine proteinase, putative OS=Entamoeba histolytica GN=EHI_010850 PE=3 SV=1	EHI_010850
Oxysterol binding protein, putative OS=Entamoeba histolytica GN=EHI_023470 PE=2 SV=1	EHI_023470
F-actin capping protein alpha subunit, putative OS=Entamoeba histolytica GN=EHI_033740 PE=2 SV=1	EHI_033740
Cluster of Rho guanine nucleotide exchange factor, putative OS=Entamoeba histolytica GN=EHI_039480 PE=4 SV=1 (C4M8C8)	EHI_039480
Prolyl-tRNA synthetase, putative OS=Entamoeba histolytica GN=EHI_040400 PE=3 SV=1	EHI_040400
60S ribosomal protein L10, putative OS=Entamoeba histolytica GN=EHI_044810 PE=2 SV=1	EHI_044810
Lysine--tRNA ligase OS=Entamoeba histolytica GN=EHI_047810 PE=3 SV=1	EHI_047810
Dolichol monophosphate mannose synthase, putative OS=Entamoeba histolytica GN=EHI_054260 PE=4 SV=1	EHI_054260
Vacuolar protein sorting 26 OS=Entamoeba histolytica GN=EhVPS26 PE=4 SV=1	EHI_062490
Uncharacterized protein OS=Entamoeba histolytica GN=EHI_064640 PE=2 SV=1	EHI_064640
Cluster of Rab family GTPase OS=Entamoeba histolytica GN=EHI_117890 PE=3 SV=1 (C4LYX3)	EHI_117890
Rab family GTPase (Fragment) OS=Entamoeba histolytica GN=EhRabC5 PE=3 SV=1	EHI_122730
40S ribosomal protein S17, putative OS=Entamoeba histolytica GN=EHI_135060 PE=3 SV=1	EHI_135060
Phosphoinositide phosphatase, putative OS=Entamoeba histolytica GN=EHI_141860 PE=4 SV=1	EHI_141860
Long-chain-fatty-acid--CoA ligase, putative OS=Entamoeba histolytica GN=EHI_147010 PE=4 SV=1	EHI_147010
Ankyrin repeat protein, putative OS=Entamoeba histolytica GN=EHI_155190 PE=4 SV=1	EHI_155190
LIM zinc finger domain containing protein OS=Entamoeba histolytica GN=EHI_161940 PE=4 SV=1	EHI_161940
Proteasome subunit alpha type OS=Entamoeba histolytica GN=EHI_163650 PE=3 SV=1	EHI_163650
Putative uncharacterized protein OS=Entamoeba histolytica GN=EHI_177300 PE=4 SV=1	EHI_177300
Cluster of Putative uncharacterized protein OS=Entamoeba histolytica GN=EHI_178980 PE=3 SV=1 (C4LUW1)	EHI_178980
Molybdenum cofactor sulfurase putative OS=Entamoeba histolytica GN=EHI_194600 PE=3 SV=1	EHI_194600
Cluster of Heat shock protein 90, putative OS=Entamoeba histolytica GN=EHI_196940 PE=3 SV=1 (C4LVB2)	EHI_196940
Putative uncharacterized protein OS=Entamoeba histolytica GN=EHI_199660 PE=4 SV=1	EHI_199660
Protein kinase, putative OS=Entamoeba histolytica GN=EHI_004790 PE=2 SV=1	EHI_004790
Uncharacterized protein OS=Entamoeba histolytica GN=EHI_007350 PE=2 SV=1	EHI_007350
Gelsolin repeat protein, putative OS=Entamoeba histolytica GN=EHI_009570 PE=4 SV=1	EHI_009570
Cluster of Putative uncharacterized protein OS=Entamoeba histolytica GN=EHI_022130 PE=4 SV=1 (C4MAT9)	EHI_022130
Calmodulin, putative OS=Entamoeba histolytica GN=EHI_023500 PE=4 SV=1	EHI_023500
Rab family GTPase (Fragment) OS=Entamoeba histolytica GN=EhRabK1 PE=3 SV=1	EHI_024680
Putative vacuolar sorting protein OS=Entamoeba histolytica GN=vsp PE=4 SV=1	EHI_025270
Serine/threonine-protein phosphatase OS=Entamoeba histolytica GN=EHI_031240 PE=3 SV=1	EHI_031240
Signal peptidase, putative OS=Entamoeba histolytica GN=EHI_031250 PE=4 SV=1	EHI_031250
Putative uncharacterized protein OS=Entamoeba histolytica GN=EHI_035980 PE=4 SV=1	EHI_035980
Coatomer subunit gamma OS=Entamoeba histolytica GN=EHI_040700 PE=3 SV=1	EHI_040700
T-complex protein 1 subunit eta, putative OS=Entamoeba histolytica GN=EHI_044940 PE=3 SV=1	EHI_044940
Rab family GTPase (Fragment) OS=Entamoeba histolytica GN=EhRabI2 PE=3 SV=1	EHI_053420
Mitogen-activated protein kinase OS=Entamoeba histolytica GN=EHI_073650 PE=2 SV=1	EHI_073650
Proteasome beta subunit, putative OS=Entamoeba histolytica GN=EHI_078710 PE=4 SV=1	EHI_078710
Alpha1-COP OS=Entamoeba histolytica GN=EHI_088090 PE=4 SV=1	EHI_088090
Putative uncharacterized protein OS=Entamoeba histolytica GN=EHI_092080 PE=4 SV=1	EHI_092080
Cluster of Dolychil-diphosphooligosaccharide--protein glycosyltransferase subunit, putative OS=Entamoeba histolytica GN=EHI_093790 PE=4 SV=1 (C4LYH0)	EHI_093790
Glycosyltransferase, putative OS=Entamoeba histolytica GN=EHI_093950 PE=4 SV=1	EHI_093950
Coated vesicle membrane protein, putative (Fragment) OS=Entamoeba histolytica GN=EHI_096210 PE=3 SV=1	EHI_096210
Clathrin adaptor complex small chain, putative OS=Entamoeba histolytica GN=EHI_103550 PE=4 SV=1	EHI_103550
LIM zinc finger domain containing protein OS=Entamoeba histolytica GN=EHI_110280 PE=4 SV=1	EHI_110280
3-ketoacyl-CoA synthase OS=Entamoeba histolytica GN=EHI_111000 PE=3 SV=1	EHI_111000
WD domain containing protein OS=Entamoeba histolytica GN=EHI_118780 PE=4 SV=1	EHI_118780
Microsomal signal peptidase subunit, putative OS=Entamoeba histolytica GN=EHI_121860 PE=4 SV=1	EHI_121860
Putative uncharacterized protein OS=Entamoeba histolytica GN=EHI_122850 PE=4 SV=1	EHI_122850
Thioredoxin, putative OS=Entamoeba histolytica GN=EHI_133970 PE=4 SV=1	EHI_133970
S-phase kinase-associated protein 1A, putative OS=Entamoeba histolytica GN=EHI_134960 PE=4 SV=1	EHI_134960
Uncharacterized protein OS=Entamoeba histolytica GN=EHI_135090 PE=2 SV=1	EHI_135090
Nucleosome assembly protein, putative OS=Entamoeba histolytica GN=EHI_139460 PE=3 SV=1	EHI_139460
HEAT repeat domain containing protein OS=Entamoeba histolytica GN=EHI_151640 PE=4 SV=1	EHI_151640
Putative uncharacterized protein OS=Entamoeba histolytica GN=EHI_154330 PE=4 SV=1	EHI_154330
Putative uncharacterized protein (Fragment) OS=Entamoeba histolytica GN=EHI_154450 PE=4 SV=1	EHI_154450
Type A flavoprotein, putative OS=Entamoeba histolytica GN=EHI_159860 PE=4 SV=1	EHI_159860
60S ribosomal protein L23, putative OS=Entamoeba histolytica GN=EHI_051710 PE=3 SV=1	EHI_051710
Actinin-like protein, putative OS=Entamoeba histolytica GN=EHI_164430 PE=4 SV=1	EHI_164430
Vacuolar ATP synthase subunit E, putative OS=Entamoeba histolytica GN=EHI_182550 PE=4 SV=1	EHI_182550
Long-chain-fatty-acid--CoA ligase, putative OS=Entamoeba histolytica GN=EHI_188590 PE=4 SV=1	EHI_188590
Rho family GTPase OS=Entamoeba histolytica GN=EHI_190440 PE=3 SV=1	EHI_190440
40S ribosomal protein S10, putative OS=Entamoeba histolytica GN=EHI_197030 PE=4 SV=1	EHI_197030
Putative uncharacterized protein OS=Entamoeba histolytica GN=EHI_001830 PE=4 SV=1	EHI_001830
Putative uncharacterized protein OS=Entamoeba histolytica GN=EHI_006070 PE=4 SV=1	EHI_006070
Phosphatidylserine synthase, putative OS=Entamoeba histolytica GN=EHI_009800 PE=4 SV=1	EHI_009800
Dihydropyrimidine dehydrogenase, putative OS=Entamoeba histolytica GN=EHI_012980 PE=4 SV=1	EHI_012980
Putative uncharacterized protein OS=Entamoeba histolytica GN=EHI_017630 PE=4 SV=1	EHI_017630
Putative uncharacterized protein OS=Entamoeba histolytica GN=EHI_019090 PE=4 SV=1	EHI_019090
Putative uncharacterized protein OS=Entamoeba histolytica GN=EHI_020330 PE=4 SV=1	EHI_020330
Putative uncharacterized protein OS=Entamoeba histolytica GN=EHI_023410 PE=4 SV=1	EHI_023410
G protein-coupled receptor 1 OS=Entamoeba histolytica GN=EHI_025100 PE=2 SV=1	EHI_025100
Ubiquitin-conjugating enzyme family protein OS=Entamoeba histolytica GN=EHI_025230 PE=4 SV=1	EHI_025230
RNA recognition motif domain containing protein OS=Entamoeba histolytica GN=EHI_026440 PE=4 SV=1	EHI_026440
Uncharacterized protein OS=Entamoeba histolytica GN=EHI_026470 PE=2 SV=1	EHI_026470
Chitobiosyldiphosphodolichol beta-mannosyltransferase, putative OS=Entamoeba histolytica GN=EHI_028950 PE=4 SV=1	EHI_028950
Dolychil-diphosphooligosaccharide--protein glycosyltransferase subunit, putative OS=Entamoeba histolytica GN=EHI_029540 PE=4 SV=1	EHI_029540
Plasma membrane calcium-transporting ATPase, putative OS=Entamoeba histolytica GN=EHI_030830 PE=3 SV=1	EHI_030830
WD repeat protein OS=Entamoeba histolytica GN=EHI_038880 PE=2 SV=1	EHI_038880
S phingosine-1-phosphate lyase 1, putative OS=Entamoeba histolytica GN=EHI_039350 PE=3 SV=1	EHI_039350
Vacuolar protein sorting 35, putative OS=Entamoeba histolytica GN=EHI_041950 PE=4 SV=1	EHI_041950
60S ribosomal protein L35, putative OS=Entamoeba histolytica GN=EHI_042720 PE=3 SV=1	EHI_042720
UMP-CMP kinase, putative OS=Entamoeba histolytica GN=EHI_044740 PE=3 SV=1	EHI_044740
Palmitoyltransferase OS=Entamoeba histolytica GN=EHI_047770 PE=3 SV=1	EHI_047770
Threonine dehydratase OS=Entamoeba histolytica GN=EhTD2 PE=4 SV=1	EHI_049910
Putative uncharacterized protein OS=Entamoeba histolytica GN=EHI_049950 PE=4 SV=1	EHI_049950
Cluster of HEAT repeat domain containing protein OS=Entamoeba histolytica GN=EHI_050150 PE=4 SV=1 (C4LTQ2)	EHI_050150
Putative uncharacterized protein OS=Entamoeba histolytica GN=EHI_050950 PE=4 SV=1	EHI_050950
Cation-transporting P-typeATPase, putative OS=Entamoeba histolytica GN=EHI_065670 PE=3 SV=1	EHI_065670
Glycerophosphoryl diester phosphodiesterase, putative OS=Entamoeba histolytica GN=EHI_068320 PE=4 SV=1	EHI_068320
Rab family GTPase (Fragment) OS=Entamoeba histolytica GN=EhRabC7 PE=3 SV=1	EHI_079890
Hemolysin-3, putative OS=Entamoeba histolytica GN=EHI_080730 PE=2 SV=1	EHI_080730
Putative uncharacterized protein OS=Entamoeba histolytica GN=EHI_096250 PE=4 SV=1	EHI_096250
T-complex protein 1 beta subunit, putative OS=Entamoeba histolytica GN=EHI_103270 PE=3 SV=1	EHI_103270
Putative uncharacterized protein OS=Entamoeba histolytica GN=EHI_104580 PE=4 SV=1	EHI_104580
Tryptophanase, putative OS=Entamoeba histolytica GN=EHI_111610 PE=4 SV=1	EHI_111610
Putative uncharacterized protein OS=Entamoeba histolytica GN=EHI_113590 PE=4 SV=1	EHI_113590
Glycerophosphoryl diester phosphodiesterase, putative OS=Entamoeba histolytica GN=EHI_113970 PE=2 SV=1	EHI_113970
AP-2 complex subunit mu, putative OS=Entamoeba histolytica GN=EHI_124560 PE=2 SV=1	EHI_124560
Putative uncharacterized protein OS=Entamoeba histolytica GN=EHI_125940 PE=4 SV=1	EHI_125940
Putative uncharacterized protein OS=Entamoeba histolytica GN=EHI_126040 PE=4 SV=1	EHI_126040
Rab family GTPase OS=Entamoeba histolytica GN=EhRab21 PE=3 SV=1	EHI_129330
Putative uncharacterized protein OS=Entamoeba histolytica GN=EHI_129370 PE=4 SV=1	EHI_129370
Uncharacterized protein OS=Entamoeba histolytica GN=EHI_131160 PE=2 SV=1	EHI_131160
Leucine-rich repeat containing protein OS=Entamoeba histolytica GN=EHI_134680 PE=4 SV=1	EHI_134680
Rho family GTPase OS=Entamoeba histolytica GN=EHI_135450 PE=3 SV=1	EHI_135450
Soluble NSF attachment protein gamma isoform, putative OS=Entamoeba histolytica GN=EHI_136210 PE=4 SV=1	EHI_136210
60S acidic ribosomal protein P2, putative OS=Entamoeba histolytica GN=EHI_138770 PE=3 SV=1	EHI_138770
Putative uncharacterized protein OS=Entamoeba histolytica GN=EHI_138990 PE=4 SV=1	EHI_138990
Putative uncharacterized protein OS=Entamoeba histolytica GN=EHI_140360 PE=4 SV=1	EHI_140360
Proteasome subunit beta type OS=Entamoeba histolytica GN=EHI_148040 PE=3 SV=1	EHI_148040
Putative uncharacterized protein OS=Entamoeba histolytica GN=EHI_149860 PE=3 SV=1	EHI_149860
T-complex protein 1 subunit alpha OS=Entamoeba histolytica GN=EHI_155220 PE=3 SV=1	EHI_155220
Uncharacterized protein OS=Entamoeba histolytica GN=EHI_161930 PE=2 SV=1	EHI_161930
Putative uncharacterized protein OS=Entamoeba histolytica GN=EHI_161980 PE=4 SV=1	EHI_161980
Alpha-1,3-mannosyltransferase ALG2, putative OS=Entamoeba histolytica GN=EHI_162230 PE=4 SV=1	EHI_162230
Putative uncharacterized protein OS=Entamoeba histolytica GN=EHI_163570 PE=4 SV=1	EHI_163570
Putative uncharacterized protein OS=Entamoeba histolytica GN=EHI_167090 PE=4 SV=1	EHI_167090
Rab family GTPase OS=Entamoeba histolytica GN=EHI_168600 PE=3 SV=1	EHI_168600
Putative uncharacterized protein OS=Entamoeba histolytica GN=EHI_177190 PE=4 SV=1	EHI_177190
ATPase ASNA1 homolog OS=Entamoeba histolytica GN=EHI_177400 PE=3 SV=1	EHI_177400
Uncharacterized protein OS=Entamoeba histolytica GN=EHI_178080 PE=2 SV=1	EHI_178080
Long-chain-fatty-acid--CoA ligase, putative OS=Entamoeba histolytica GN=EHI_185240 PE=4 SV=1	EHI_185240
Putative uncharacterized protein OS=Entamoeba histolytica GN=EHI_194240 PE=4 SV=1	EHI_194240
Putative uncharacterized protein OS=Entamoeba histolytica GN=EHI_194850 PE=4 SV=1	EHI_194850
Putative uncharacterized protein OS=Entamoeba histolytica GN=EHI_196400 PE=4 SV=1	EHI_196400
19S cap proteasome S2 subunit OS=Entamoeba histolytica GN=EHI_198010 PE=4 SV=1	EHI_198010
Signal recognition particle receptor alpha subunit, putative OS=Entamoeba histolytica GN=EHI_200840 PE=4 SV=1	EHI_200840
Leukocyte-endothelial cell adhesion molecule 3, putative OS=Entamoeba histolytica GN=EHI_201200 PE=2 SV=1	EHI_201200

## Sheet: Supplemental Table S3
<PANTHER-categorized phagosomal proteins shown in Supplemental Table S2>
Protein annotation	EHI_number
RNA metabolism protein (PC00031: p=4.35E-01: the number of protein=7)
Polyadenylate-binding protein, putative;EHI_198750;ortholog	EHI_198750
DEAD/DEAH box helicase, putative;EHI_093900;ortholog	EHI_093900
Polyadenylate-binding protein, putative;EHI_033250;ortholog	EHI_033250
Enhancer binding protein-1;EHI_121780;ortholog	EHI_121780
WD domain containing protein;EHI_118780;ortholog	EHI_118780
Uncharacterized protein;EHI_006070;ortholog	EHI_006070
RNA recognition motif domain containing protein;EHI_026440;ortholog	EHI_026440
chaperone (PC00072: p=1.42E-02: the number of protein=9)
Uncharacterized protein;EHI_035730;ortholog	EHI_035730
T-complex protein 1 subunit delta;EHI_114120;ortholog	EHI_114120
T-complex protein 1 subunit eta;EHI_044940;ortholog	EHI_044940
CCT-alpha;EHI_155220;ortholog	EHI_155220
Heat shock protein 90, putative;EHI_196940;ortholog	EHI_196940
CCT-beta;EHI_103270;ortholog	EHI_103270
Uncharacterized protein;EHI_178980;ortholog	EHI_178980
Nitrogen fixation protein NifU;EHI_049620;ortholog	EHI_049620
Heat shock protein 70 family;EHI_001950;ortholog	EHI_001950
chromatin/chromatin-binding, or -regulatory protein (PC00077: p=1.00E00: the number of protein=1)
Nucleosome assembly protein, putative;EHI_139460;ortholog	EHI_139460
cytoskeletal protein (PC00085: p=4.69E-06: the number of protein=16)
Uncharacterized protein;EHI_154330;ortholog	EHI_154330
Gelsolin repeat protein, putative;EHI_009570;ortholog	EHI_009570
Uncharacterized protein;EHI_065490;ortholog	EHI_065490
Uncharacterized protein;EHI_148050;ortholog	EHI_148050
Calmodulin, putative;EHI_148890;ortholog	EHI_148890
Actin-related protein 2/3 complex subunit 4;EHI_030820;ortholog	EHI_030820
Coronin;EHI_083590;ortholog	EHI_083590
Myosin heavy chain;EHI_140720;ortholog	EHI_140720
Pleckstrin homology (PH) domain containing protein;EHI_117920;ortholog	EHI_117920
Actin-binding protein, cofilin/tropomyosin family;EHI_186840;ortholog	EHI_186840
Profilin;EHI_176140;ortholog	EHI_176140
Actin, putative;EHI_048630;ortholog	EHI_048630
LIM zinc finger domain containing protein;EHI_161940;ortholog	EHI_161940
F-actin-capping protein subunit alpha;EHI_033740;ortholog	EHI_033740
Uncharacterized protein;EHI_118750;ortholog	EHI_118750
Calmodulin, putative;EHI_023500;ortholog	EHI_023500
membrane traffic protein (PC00150: p=3.33E-08: the number of protein=22)
Coatomer subunit beta';EHI_004590;ortholog	EHI_004590
Vacuolar protein sorting-associated protein 29;vsp;ortholog	EHI_025270
Soluble NSF attachment protein gamma isoform, putative;EHI_136210;ortholog	EHI_136210
Coatomer subunit gamma;EHI_040700;ortholog	EHI_040700
Vacuolar protein sorting 26;EhVPS26;ortholog	EHI_062490
Vacuolar protein sorting-associated protein 45, putative;EHI_154290;ortholog	EHI_154290
Adaptor protein (AP) family protein;EHI_013040;ortholog	EHI_013040
Alpha1-COP;EHI_088090;ortholog	EHI_088090
AP-2 complex subunit alpha;EHI_045710;ortholog	EHI_045710
EhSec31;EHI_103410;ortholog	EHI_103410
EhSec24C;EHI_048310;ortholog	EHI_048310
Uncharacterized protein;EHI_122850;ortholog	EHI_122850
Uncharacterized protein;EHI_161980;ortholog	EHI_161980
AP-2 complex subunit mu, putative;EHI_124560;ortholog	EHI_124560
Uncharacterized protein;EHI_199660;ortholog	EHI_199660
AP complex subunit sigma;EHI_103550;ortholog	EHI_103550
Protein transport protein SEC23;EHI_008730;ortholog	EHI_008730
Coated vesicle membrane protein, putative (Fragment);EHI_096210;ortholog	EHI_096210
Vacuolar protein sorting 35;Vps35-1;ortholog	EHI_002990
ENTH domain-containing protein;EHI_176980;ortholog	EHI_176980
Vacuolar protein sorting 35, putative;EHI_041950;ortholog	EHI_041950
Uncharacterized protein;EHI_194240;ortholog	EHI_194240
metabolite interconversion enzyme (PC00262: p=1.87E-07: the number of protein=30)
Phosphatidylserine synthase, putative;EHI_009800;ortholog	EHI_009800
Phosphoglycerate kinase;EHI_188180;ortholog	EHI_188180
Glycerophosphoryl diester phosphodiesterase, putative;EHI_068320;ortholog	EHI_068320
Dihydrothymine dehydrogenase;EHI_012980;ortholog	EHI_012980
Diacylglycerol O-acyltransferase;EHI_113590;ortholog	EHI_113590
Alcohol dehydrogenase, putative;EHI_166490;ortholog	EHI_166490
Aldehyde-alcohol dehydrogenase;EHI_160940;ortholog	EHI_160940
Hybrid-cluster protein;HCP;ortholog	EHI_004600
Tryptophanase, putative;EHI_111610;ortholog	EHI_111610
Threonine dehydratase;EhTD2;ortholog	EHI_049910
Long-chain-fatty-acid--CoA ligase, putative;EHI_079300;ortholog	EHI_079300
Inositol-3-phosphate synthase;EHI_070720;ortholog	EHI_070720
Uncharacterized protein (Fragment);EHI_154450;ortholog	EHI_154450
Glutamate synthase beta subunit, putative;EhNO1;ortholog	EHI_110520
Dolichol-phosphate mannosyltransferase subunit 1;EHI_054260;ortholog	EHI_054260
Long-chain-fatty-acid--CoA ligase, putative;EHI_188590;ortholog	EHI_188590
Dolichyl-diphosphooligosaccharide--protein glycosyltransferase subunit 1;EHI_029540;ortholog	EHI_029540
Purine nucleoside phosphorylase, putative;EHI_130960;ortholog	EHI_130960
Peroxiredoxin;EHI_145840;ortholog	EHI_145840
Purine nucleoside phosphorylase, putative;EHI_048740;ortholog	EHI_048740
Uncharacterized protein;EHI_163570;ortholog	EHI_163570
Thioredoxin reductase;EHI_155440;ortholog	EHI_155440
Adenosylhomocysteinase;EHI_068250;ortholog	EHI_068250
Galactokinase, putative;EHI_094100;ortholog	EHI_094100
Phosphotransferase;HXK1;ortholog	EHI_098290
UMP-CMP kinase, putative;EHI_044740;ortholog	EHI_044740
Alpha-1,3/1,6-mannosyltransferase ALG2;EHI_162230;ortholog	EHI_162230
Serine palmitoyltransferase, putative;EHI_152280;ortholog	EHI_152280
Cysteine synthase A, putative;EHI_024230;ortholog	EHI_024230
Type A flavoprotein, putative;EHI_096710;ortholog	EHI_096710
protein modifying enzyme (PC00260: p=3.05E-01: the number of protein=17)
Signal peptidase, putative;EHI_031250;ortholog	EHI_031250
Mitogen-activated protein kinase;EHI_073650;ortholog	EHI_073650
HEAT repeat domain containing protein;EHI_069480;ortholog	EHI_069480
S-phase kinase-associated protein 1A, putative;EHI_134960;ortholog	EHI_134960
Proteasome subunit beta;EHI_078710;ortholog	EHI_078710
Proteasome subunit alpha type;EHI_163650;ortholog	EHI_163650
Proteasome endopeptidase complex;EHI_148040;ortholog	EHI_148040
Microsomal signal peptidase subunit, putative;EHI_121860;ortholog	EHI_121860
Serine/threonine-protein phosphatase;EHI_031240;ortholog	EHI_031240
Cysteine proteinase, putative;EHI_010850;ortholog	EHI_010850
Ubiquitin-conjugating enzyme family protein;EHI_025230;ortholog	EHI_025230
Palmitoyltransferase;EHI_047770;ortholog	EHI_047770
Aminopeptidase;EHI_008380;ortholog	EHI_008380
Aminoacyl-histidine dipeptidase, putative;EHI_042170;ortholog	EHI_042170
Protein kinase, putative;EHI_004790;ortholog	EHI_004790
Tyrosine kinase, putative;EHI_138750;ortholog	EHI_138750
19S cap proteasome S2 subunit;EHI_198010;ortholog	EHI_198010
Protein-binding activity modular (PC00260: p=4.32E-01: the number of protein=19)
Rab family GTPase;EHI_168600;ortholog	EHI_168600
Rap-GAP domain-containing protein;EHI_138990;ortholog	EHI_138990
Rab family GTPase (Fragment);EhRabK1;ortholog	EHI_024680
Leucine-rich repeat containing protein;EHI_164460;ortholog	EHI_164460
Ras family GTPase;EHI_198330;ortholog	EHI_198330
Rab family GTPase (Fragment);EhRabC7;ortholog	EHI_079890
Rho guanine nucleotide exchange factor, putative;EHI_039480;ortholog	EHI_039480
Rab GDP dissociation inhibitor;EHI_167060;ortholog	EHI_167060
Rho GDP exchange inhibitor, putative;EHI_147570;ortholog	EHI_147570
Rab family GTPase (Fragment);EhRabC5;ortholog	EHI_122730
Rho family GTPase;EHI_190440;ortholog	EHI_190440
Uncharacterized protein;EHI_017630;ortholog	EHI_017630
Rab family GTPase;EHI_117890;ortholog	EHI_117890
Ras-related protein Rab-21;EhRab21;ortholog	EHI_129330
Signal recognition particle receptor alpha subunit, putative;EHI_200840;ortholog	EHI_200840
HEAT repeat domain containing protein;EHI_050150;ortholog	EHI_050150
ADP-ribosylation factor 1, putative;EHI_073470;ortholog	EHI_073470
Rho family GTPase;EHI_135450;ortholog	EHI_135450
Rab family GTPase (Fragment);EhRabI2;ortholog	EHI_053420
scaffold/adaptor protein (PC00226: p=6.95E-02: the number of protein=6)
Cortexillin, putative;EHI_104560;ortholog	EHI_104560
14-3-3 protein 2;EHI_098280;ortholog	EHI_098280
Leucine-rich repeat containing protein;EHI_134680;ortholog	EHI_134680
14-3-3 protein 1;EHI_025360;ortholog	EHI_025360
SH3 domain-containing protein;EHI_026470;ortholog	EHI_026470
Uncharacterized protein;EHI_178080;ortholog	EHI_178080
transfer/carrier protein (PC00219: p=1.81E-01: the number of protein=1)
Oxysterol binding protein, putative;EHI_023470;ortholog	EHI_023470
translational protein (PC00263: 5.39E-06: the number of protein=22)
60S acidic riboomal protein P1, putative;EHI_042920;ortholog	EHI_042920
Prolyl-tRNA synthetase;EHI_040400;ortholog	EHI_040400
60S ribosomal protein L10a, putative;EHI_012480;ortholog	EHI_012480
40S ribosomal protein S10, putative;EHI_197030;ortholog	EHI_197030
Ribosomal protein L15;EHI_020300;ortholog	EHI_020300
40S ribosomal protein S13, putative;EHI_035460;ortholog	EHI_035460
40S ribosomal protein S3, putative;EHI_146340;ortholog	EHI_146340
60S ribosomal protein L3, putative;EHI_005890;ortholog	EHI_005890
60S ribosomal protein L23, putative;EHI_051710;ortholog	EHI_051710
40S ribosomal protein SA;EHI_081410;ortholog	EHI_081410
60S acidic ribosomal protein P2, putative;EHI_138770;ortholog	EHI_138770
Seryl-tRNA synthetase;EHI_092640;ortholog	EHI_092640
40S ribosomal protein S4, putative;EHI_118170;ortholog	EHI_118170
60S acidic ribosomal protein P0;EHI_090400;ortholog	EHI_090400
60S ribosomal protein L35, putative;EHI_042720;ortholog	EHI_042720
Eukaryotic translation initiation factor 5A;EHI_186480;ortholog	EHI_186480
40S ribosomal protein S17, putative;EHI_135060;ortholog	EHI_135060
Elongation factor 2;EHI_166810;ortholog	EHI_166810
Aspartyl-tRNA synthetase;EHI_175050;ortholog	EHI_175050
Lysine--tRNA ligase;EHI_047810;ortholog	EHI_047810
PIWI, putative;EHI_125650;ortholog	EHI_125650
60S ribosomal protein L10, putative;EHI_044810;ortholog	EHI_044810
transmembrane signal receptor (PC00197: 3.48E-01: the number of protein=1)
Hemolysin-3, putative;EHI_080730;ortholog	EHI_080730
transporter (PC00227: p=3.60E-01: the number of protein=7)
DUF1681 domain-containing protein;EHI_007350;ortholog	EHI_007350
EhSec13 (Fragment);EHI_001050;ortholog	EHI_001050
Calcium-transporting ATPase;EHI_030830;ortholog	EHI_030830
ATPase ASNA1 homolog;EHI_177400;ortholog	EHI_177400
HEAT repeat domain containing protein;EHI_151640;ortholog	EHI_151640
Cation-transporting P-typeATPase, putative;EHI_065670;ortholog	EHI_065670
Cell division cycle protein 48, putative;EHI_045120;ortholog	EHI_045120

## Sheet: Supplemental Table S4
09100 Metabolism
09101 Carbohydrate metabolism
00010 Glycolysis / Gluconeogenesis [PATH:ehi00010]
EHI_098290 77.t00021; hexokinase
EHI_188180 75.t00020; phosphoglycerate kinase
EHI_160940 22.t00022; alcohol dehydrogenase
00051 Fructose and mannose metabolism [PATH:ehi00051]
EHI_098290 77.t00021; hexokinase
00052 Galactose metabolism [PATH:ehi00052]
EHI_094100 349.t00010; galactokinase
EHI_098290 77.t00021; hexokinase
00500 Starch and sucrose metabolism [PATH:ehi00500]
EHI_098290 77.t00021; hexokinase
00520 Amino sugar and nucleotide sugar metabolism [PATH:ehi00520]
EHI_098290 77.t00021; hexokinase
EHI_094100 349.t00010; galactokinase
00620 Pyruvate metabolism [PATH:ehi00620]
EHI_160940 22.t00022; alcohol dehydrogenase
00650 Butanoate metabolism [PATH:ehi00650]
EHI_160940 22.t00022; alcohol dehydrogenase
00562 Inositol phosphate metabolism [PATH:ehi00562]
EHI_070720 57.t00034; L-myo-inositol-1-phosphate synthase
09102 Energy metabolism
00910 Nitrogen metabolism [PATH:ehi00910]
EHI_110520 5.t00071; glutamate synthase beta subunit
00920 Sulfur metabolism [PATH:ehi00920]
EHI_024230 189.t00001; cysteine synthase A
09103 Lipid metabolism
00061 Fatty acid biosynthesis [PATH:ehi00061]
EHI_079300 183.t00002; long-chain-fatty-acid--CoA ligase
EHI_188590 301.t00003; long-chain-fatty-acid--CoA ligase
00071 Fatty acid degradation [PATH:ehi00071]
EHI_079300 183.t00002; long-chain-fatty-acid--CoA ligase
EHI_188590 301.t00003; long-chain-fatty-acid--CoA ligase
EHI_160940 22.t00022; alcohol dehydrogenase
00564 Glycerophospholipid metabolism [PATH:ehi00564]
EHI_068320 61.t00044; glycerophosphoryl diester phosphodiesterase
EHI_009800 4.t00097; phosphatidylserine synthase
00600 Sphingolipid metabolism [PATH:ehi00600]
EHI_152280 6.t00099; serine palmitoyltransferase
09104 Nucleotide metabolism
00230 Purine metabolism [PATH:ehi00230]
EHI_130960 27.t00016; purine nucleoside phosphorylase
EHI_044740 3.t00004; UMP-CMP kinase
00240 Pyrimidine metabolism [PATH:ehi00240]
EHI_048740 107.t00022; purine nucleoside phosphorylase
EHI_012980 14.t00017; dihydropyrimidine dehydrogenase
09105 Amino acid metabolism
00250 Alanine, aspartate and glutamate metabolism [PATH:ehi00250]
EHI_110520 5.t00071; glutamate synthase beta subunit
00260 Glycine, serine and threonine metabolism [PATH:ehi00260]
EHI_049910 4.t00026; threonine dehydratase
00270 Cysteine and methionine metabolism [PATH:ehi00270]
EHI_024230 189.t00001; cysteine synthase A
EHI_068250 150.t00003; adenosylhomocysteinase
00290 Valine, leucine and isoleucine biosynthesis [PATH:ehi00290]
EHI_049910 4.t00026; threonine dehydratase
00350 Tyrosine metabolism [PATH:ehi00350]
EHI_160940 22.t00022; alcohol dehydrogenase
00380 Tryptophan metabolism [PATH:ehi00380]
EHI_111610 347.t00005; tryptophanase
09106 Metabolism of other amino acids
00410 beta-Alanine metabolism [PATH:ehi00410]
EHI_012980 14.t00017; dihydropyrimidine dehydrogenase
00450 Selenocompound metabolism [PATH:ehi00450]
EHI_155440 23.t00001; thioredoxin reductase
09107 Glycan biosynthesis and metabolism
00510 N-Glycan biosynthesis [PATH:ehi00510]
EHI_054260 167.t00003; dolichol monophosphate mannose synthase
EHI_162230 alpha-1
EHI_029540 248.t00006; dolychil-diphosphooligosaccharide-- protein glycosyltransferase subunit
00513 Various types of N-glycan biosynthesis [PATH:ehi00513]
EHI_162230 alpha-1
EHI_029540 248.t00006; dolychil-diphosphooligosaccharide-- protein glycosyltransferase subunit
09108 Metabolism of cofactors and vitamins
00730 Thiamine metabolism [PATH:ehi00730]
EHI_044740 3.t00004; UMP-CMP kinase
00760 Nicotinate and nicotinamide metabolism [PATH:ehi00760]
EHI_130960 27.t00016; purine nucleoside phosphorylase
00770 Pantothenate and CoA biosynthesis [PATH:ehi00770]
EHI_012980 14.t00017; dihydropyrimidine dehydrogenase
09110 Biosynthesis of other secondary metabolites
00524 Neomycin, kanamycin and gentamicin biosynthesis
EHI_098290 77.t00021; hexokinase
09120 Genetic Information Processing
09123 Folding, sorting and degradation
04141 Protein processing in endoplasmic reticulum [PATH:ehi04141]
EHI_029540 248.t00006; dolychil-diphosphooligosaccharide-- protein glycosyltransferase subunit
09140 Cellular Processes
09141 Transport and catabolism
04146 Peroxisome [PATH:ehi04146]
EHI_079300 183.t00002; long-chain-fatty-acid--CoA ligase
EHI_188590 301.t00003; long-chain-fatty-acid--CoA ligase
EHI_145840 828.t00001; peroxiredoxin
09160 Human Diseases
09174 Infectious disease: parasitic
05146 Amoebiasis [PATH:ehi05146]
EHI_160940 22.t00022; alcohol dehydrogenase
EHI_145840 828.t00001; peroxiredoxin
09180 Brite Hierarchies
09181 Protein families: metabolism
01009 Protein phosphatases and associated proteins [BR:ehi01009]
EHI_068250 150.t00003; adenosylhomocysteinase
01003 Glycosyltransferases [BR:ehi01003]
EHI_162230 alpha-1
EHI_054260 167.t00003; dolichol monophosphate mannose synthase
01004 Lipid biosynthesis proteins [BR:ehi01004]
EHI_079300 183.t00002; long-chain-fatty-acid--CoA ligase
EHI_188590 301.t00003; long-chain-fatty-acid--CoA ligase
01007 Amino acid related enzymes [BR:ehi01007]
EHI_152280 6.t00099; serine palmitoyltransferase
09182 Protein families: genetic information processing
04131 Membrane trafficking [BR:ehi04131]
EHI_098290 77.t00021; hexokinase
09183 Protein families: signaling and cellular processes
04147 Exosome [BR:ehi04147]
EHI_188180 75.t00020; phosphoglycerate kinase
EHI_145840 828.t00001; peroxiredoxin
EHI_079300 183.t00002; long-chain-fatty-acid--CoA ligase
EHI_188590 301.t00003; long-chain-fatty-acid--CoA ligase
EHI_068250 150.t00003; adenosylhomocysteinase
EHI_044740 3.t00004; UMP-CMP kinase
EHI_094100 349.t00010; galactokinase
